# Supplementary material for: Widely Targeted Metabolomics and Network Pharmacology Reveal the Nutritional Potential of Yellowhorn (Xanthoceras sorbifolium Bunge) Leaves and Flowers
Source: MDPI journal article supplement (doi:10.3390/foods13081274), 2024-04-21
Supplement: s1 [file s1]

Table S3 Gene symbol of target proteins interacts with non-volatile differential metabolites in flowers and leaves by network pharmacological analysis.

|        | Gene symbol                                                                                                                                                                                                                                                                                                                                                                                                                                                                                                                                                                                                                                                                                                                                                                                                                                                                                                                                                                                                                                                                                                                                                                                                                                                                                                                                                                                                                                                                                                                                                                                                                                                                                                                                                                                                                                                                                                                                                                                                                                                                                                                                                                                                                                                                                                                                                                                                                                                                                                                                                                                                                                                                                                             |
|--------|-------------------------------------------------------------------------------------------------------------------------------------------------------------------------------------------------------------------------------------------------------------------------------------------------------------------------------------------------------------------------------------------------------------------------------------------------------------------------------------------------------------------------------------------------------------------------------------------------------------------------------------------------------------------------------------------------------------------------------------------------------------------------------------------------------------------------------------------------------------------------------------------------------------------------------------------------------------------------------------------------------------------------------------------------------------------------------------------------------------------------------------------------------------------------------------------------------------------------------------------------------------------------------------------------------------------------------------------------------------------------------------------------------------------------------------------------------------------------------------------------------------------------------------------------------------------------------------------------------------------------------------------------------------------------------------------------------------------------------------------------------------------------------------------------------------------------------------------------------------------------------------------------------------------------------------------------------------------------------------------------------------------------------------------------------------------------------------------------------------------------------------------------------------------------------------------------------------------------------------------------------------------------------------------------------------------------------------------------------------------------------------------------------------------------------------------------------------------------------------------------------------------------------------------------------------------------------------------------------------------------------------------------------------------------------------------------------------------------|
| Flower | <p>NFKB1, APEX1, HIF1A, PSMB1, KLF5, GPR55, KDM1A, NR1I2, CNR1, NFE2L2, TLR4, NTRK3, PTGS1, TOP2A, CLK4, CHUK, SCN2A, SLC6A5, SCN3A, NR3C2, ADAM10, CDK1, PDGFRA, CTSD, DPP9, FPR2, CACNA1B, PIK3R1, DUSP3, C5AR1, RORB, TFPI, ADORA1, GRIN1, TRIM24, PRKCD, GRIA2, METAP2, CYP3A4, CFTR, AURKB, SCD, CSNK2B, PDE3A, CNR2, HSP90AA1, GRK5, RXFP1, NTSR2, PSMB9, ACHE, CACNA1H, WDR5, S1PR5, PLA2, CCR1, CCR2, CYSLTR2, ITK, AOC3, FPRL2, FPR1, SAE1, PRMT5, RPS6KA3, NR2E3, GPR6, MAP2K2, QRFPR, SCN4A, F13A1, AR, HDAC5, PRCP, PRSS1, AXL, CDC25C, GLRA1, CCNE1, KEAP1, PRKAA1, ITGB1, GRB2, CASP8, CAPN1, GPR17, MC4R, ACACA, CACNA1C, TNK1, NOTUM, TDP1, HSD17B10, ALOX12, THRA, TTR, MAOA, FFAR4, ANPEP, LDHB, GPBAR1, HPGD, HDAC2, BLM, PIN1, GUSB, KCNA5, MDM4, PDE11A, KDM4C, PTPN7, ACVRL1, AVPR1B, SLC2A1, CAMKK2, PDGFRB, KIF11, PRKCZ, DHODH, CBX4, CHKA, GLO1, ENPP1, KDM4A, SERPINE1, PLAT, FAAH, PDE3B, P2RX4, S1PR4, GLS, NOX1, TYRO3, PTPN11, HTR2C, NPC1, NAAA, DCUN1D1, PTGER1, NR4A1, MTOR, MIF, CREBBP, ESR2, HDAC8, DYRK1A, RPS6KA1, NLK, CXCR4, ZAP70, AKR1C1, ERN1, STAT1, MAPKAPK2, DRD1, GBA2, TBK1, CDK2, SLC1A3, ACVR1, DPP7, CDK5, LGALS3, CHRM2, RPS6KA6, ADRB1, FCGRT, MME, SLC1A1, CHEK1, ERAP1, HSP90AB1, ACE, AAK1, GCK, NQO2, MMP12, NOS2, PTGER2, CHRM1, ABCC1, SLC1A2, HDAC10, EGLN1, CYP19A1, MCHR1, CDC25B, TACR1, GSK3A, GABRA1, DNMT1, PPIA, XDH, ACVR1B, MELK, TNIK, EIF2AK1, CLK2, ALOX5, MC5R, YES1, BRDT, ACACB, AKR1B1, GBA, IMPDH2, HRH3, CHRM3, TBXA2R, PTPN1, PTPN2, ATG4B, TLR8, HDAC7, TACR2, SLC40A1, SLC9A1, AKR1C3, OPRK1, CHRM4, MAP3K14, STK3, ADK, PNMT, CHRNA4, CHRM5, PRKACA, KLK1, RAB9A, NT5E, TYMS, CLK1, PTGS2, HDAC11, TOP1, KDM5A, MINK1, HDAC9, SIRT1, PKN2, CHRNA2, FASN, ADORA2B, BMPR1A, PKN1, PARP2, CSNK1E, HDAC3, ULK3, TMPRSS6, GSTP1, NEK2, HSD11B1, CDK4, KLK7, ABCG2, NOS3, ULK1, KIT, PSMB2, PDE9A, HPRT1, APLNR, IL23R, SLC6A2, MAP4K4, HRH4, HSD11B2, CSNK2A2, MARK4, GPR35, PHF8, KDM5C, TYMP, TBXAS1, CHRNA7, RPS6KA5, PTGES, CA3, CDK7, TDO2, TRPM8, CHEK2, AKT3, MAP3K11, HDAC4, KLK5, CSNK1D, DYRK1B, KLKB1, FDP5, BRD2, PKMYT1, GRM2, MAOB, FYN, DUT, TAOK1, LNPEP, GHSR, STING1, CYP2A6, P2RX7, CTSS, LYN, ALK, HTR1A, FGR, DPP8, DAO, GSK3B, ADAM17, PYGL, CHRNA1, IRAK1, AKR1C2, CASP6, EPHB2, EPHB3, CETP, DOT1L, MAPK1, OPRD1, CCR5, OPRM1, PIK3CD, P2RY12, S1PR3, ARG2, SPHK1, BTK, AKT2, PIK3CB, FAP, ABL1, MAP3K5, SLC5A1, APH1A, PARP1, PLA2G2A, PRKCA, FBP1, TGFB2, F12, PAK4, APP, PDE4D, DPP4, ATR, NR1H4, NR3C1, CDC7, DCK, SLC6A4, STAT3, P2RY4, NOX4, FNTA, PRMT1, PDE5A, F2R, CFD, TGM2, PPARG, VDR, SIRT3, FLT1, CXCR6, PTK2B, SPHK2, DRD2, BMP2K, TYK2, RET, GAK, EZH2, HTR3A, KDM6B, PREP, KCNK9, and NAMPT.</p> |
| Leaf   | <p>BLM, GPR55, TRIM24, PTGS1, NFKB1, CTSD, KDM1A, STAT3, APEX1, CYP3A4, NR3C2, PTPN2, CLK4, ADAM10, CDK5, HSD17B10, GLRA1, CSNK2B, HSP90AB1, NTRK3, FPR2, TLR4, NTSR2, PDE3A, CDC25B, SCN3A, PIK3R1, SCN2A, KLF5, TOP2A, GRIN1, AKR1C3, CNR2, AR, CLK1, PDGFRA, SLC9A1, FPR1, ITK, CACNA1B, TACR2, FPRL2, DPP9, GPR6, NR4A1, ADORA1, PROC, PRCP, CPT2, CYSLTR2, S1PR5, TERT, CHRM4, PLAT, CACNA1H, HDAC7, TLR8, QRFPR, RPS6KA1, CDC25C, AURKB, TFPI, MTOR, C5AR1, SAE1, PTK2B, CHRM1, PTGER1, PSMB9, STING1, DPP8, MARK4, SPHK1, CHRM5, SLC6A5, THRA.</p>                                                                                                                                                                                                                                                                                                                                                                                                                                                                                                                                                                                                                                                                                                                                                                                                                                                                                                                                                                                                                                                                                                                                                                                                                                                                                                                                                                                                                                                                                                                                                                                                                                                                                                                                                                                                                                                                                                                                                                                                                                                                                                                                                               |

Table S3 Gene symbol of target proteins interacts with non-volatile differential metabolites in flowers and leaves by network pharmacological analysis (continued).

|      | Targets                                                                                                                                                                                                                                                                                                                                                                                                                                                                                                                                                                                                                                                                                                                                                                                                                                                                                                                                                                                                                                                                                                                                                                                                                                                                                                                                                                                                                                                                                                                                                                                                                                                                                                                                                                                                                                                                                                                                                                                                                                                                                                                                                                                                                                                                                                                                                                                                                                    |
|------|--------------------------------------------------------------------------------------------------------------------------------------------------------------------------------------------------------------------------------------------------------------------------------------------------------------------------------------------------------------------------------------------------------------------------------------------------------------------------------------------------------------------------------------------------------------------------------------------------------------------------------------------------------------------------------------------------------------------------------------------------------------------------------------------------------------------------------------------------------------------------------------------------------------------------------------------------------------------------------------------------------------------------------------------------------------------------------------------------------------------------------------------------------------------------------------------------------------------------------------------------------------------------------------------------------------------------------------------------------------------------------------------------------------------------------------------------------------------------------------------------------------------------------------------------------------------------------------------------------------------------------------------------------------------------------------------------------------------------------------------------------------------------------------------------------------------------------------------------------------------------------------------------------------------------------------------------------------------------------------------------------------------------------------------------------------------------------------------------------------------------------------------------------------------------------------------------------------------------------------------------------------------------------------------------------------------------------------------------------------------------------------------------------------------------------------------|
| Leaf | <p>ATG4B, CDK1, WDR5, AVPR1B, PLA1, PTGER2, CHRM2, FKBP1A, TDP1, MAOA, TTR, XDH, NR1I2, ABCC1, ALOX12, EGLN1, RPS6KA3, PSMB1, PRKCZ, DUSP3, DRD2, SLC2A1, OPRM1, GPR17, F13A1, ROCK1, GRM5, CDK2, OPRD1, CAPN1, FFAR4, CHRNA4, DRD1, AAK1, DNMT1, PRKACA, RORB, LGALS3, SERPINE1, LYN, SCN9A, IL23R, KEAP1, STAT1, RPS6KA6, DUT, CETP, ACVRL1, GLO1, MAP2K2, CASP8, ZAP70, HDAC5, FCGRT, RET, PKN1, CHUK, FFAR2, ACACA, BRAF, STK3, SCD, ITGB1, ACE, FAAH, ERAP1, ABCB1, F2R, PTPN11, PIK3CB, ACVR1B, PIN1, GRB2, DRD3, HDAC11, YES1, KDM6B, ESR2, GRIA2, HIF1A, HPGD, GPBAR1, KDM4C, ANPEP, GUSB, NOS2, CXCR4, HSP90AA1, LDHB, PTPN7, METAP2, CFTR, NFE2L2, PDGFRB, CAMKK2, NPC1, GRK5, MME, HDAC2, CHKA, PDE3B, NT5E, DCUN1D1, NAAA, KDM4A, PDE11A, KIF11, CBX4, MIF, NOS3, HRH3, KCNA5, HTR2C, GABRA1, SCN4A, NLK, MC5R, AOC3, GPR35, ACHE, CHRM3, AKR1C1, RXFP1, ADRB1, P2RX4, TYRO3, CXCR6, S1PR4, TBXA2R, MDM4, ACACB, TACR1, TBK1, NOTUM, ENPP1, GBA, CCNE1, RAB9A, GLS, NOX1, GSTP1, PSMB2, MAOB, GBA2, CA3, PKN2, NQO2, TNIK, KLK5, FFAR1, RPS6KA5, TOP1, LNPEP, AKR1C2, FYN, CYP2A6, BRDT, TMPPRS6, KLK1, HTR7, PRSS1, MAP2K1, TAOK3, ULK1, TRPA1, PLK4, CCR1, CHEK1, ERN1, CCR2, PLA2G2A, EPHB2, SLC1A3, KLK7, FGR, KDR, PARP2, ADORA2A, DPP7, SLC1A1, CPT1B, SLC1A2, ADORA3, EPHX2, CASP6, FLT3, ITGB3, KIT, SOAT1, EPHB3, NR2E3, KCNK9, GRM4, CTSS, CHRNA1, MAP3K5, MAPK1, DOT1L, PIK3CD, P2RY12, ARG2, PTPN1, S1PR3, LTA4H, CCR5, CSNK2A2, CSNK2A1, CTSG, SLC40A1, F12, FAP, PARP1, OPRK1, ABL1, AKT2, TBXAS1, ST14, NAMPT, HTR2A, APLNR, CFD, MET, JAK2, PRKCA, IDE, AKT3, NR1H3, PRKCD, ADORA2B, HDAC8, SLC6A2, BMP2K, HDAC3, DYRK1B, PRKCQ, CDC7, PPIA, MAP3K11, FDPS, HDAC10, BCHE, CSK, CLK2, AXL, TYMS, HDAC9, ALOX5, HSD11B2, MC4R, F11, NTSR1, PREP, KCNH2, CDK7, CARM1, SLC6A4, PRMT6, MMP7, IKBKB, PAK4, TAOK1, HDAC4, ERAP2, NOS1, DYRK1A, EPHA4, ROCK2, DAO, ESR1, PKMYT1, HCAR2, BMPR1A, HSD11B1, GCK, MCHR1, P2RX7, NEK2, MAP4K4, IMPDH2, FLT1, ALK, CTSK, DCTPP1, HTR3A, CNR1, HDAC1, CDK4, F7, MAP3K14, CTSB, PIK3CA, FER, BCL6, UGT2B7, TEC, ICMT, IDO1, S1PR2, CTSL, PDPK1, P2RY2, TGM2, CD38, BCR, CAMK2D, PRMT1, PARG, ADAM17, PPARA, DPP4, IDH1, PIK3CG, RXRB, PRMT5, PRKAA1, VDR, MAP3K20, RIPK3, AHCY, SLC6A3, TDO2, TDP2, BRD4, ATAD2, SPHK2, EP300, F2, MARK3, GHSR, PDE7A, FABP4, RXRG, EGFR, TTK, ULK3, FKBP5, FBP1, GRM3, TGFBR2, MAPKAPK2, SLC5A1, SYK, PLK1, NMT1, APH1A, NTRK1, and MMP1.</p> |

Table S4 Non-volatile metabolites for yellowhorn treat enuresis, hyperlipidemia, neurodegenerative diseases, and prostatitis.

| Source | Name                                              | Classification              | No.      | Degree |
|--------|---------------------------------------------------|-----------------------------|----------|--------|
| Flower | Zarzissine                                        | Alkaloids                   | Flower25 | 61     |
|        | 2-Aminopurine                                     | Nucleotides and derivatives | Flower31 | 53     |
|        | Hispidulin (5,7,4'-Trihydroxy-6-methoxyflavone)   | Flavonoids                  | Flower11 | 51     |
|        | Luteolin-3'-O-glucoside                           | Flavonoids                  | Flower13 | 47     |
|        | Naringenin (5,7,4'-Trihydroxyflavanone)           | Flavonoids                  | Flower4  | 47     |
|        | Diosmetin (5,7,3'-Trihydroxy-4'-methoxyflavone)   | Flavonoids                  | Flower9  | 47     |
|        | Luteolin-7-O-gentiobioside                        | Flavonoids                  | Flower15 | 46     |
|        | 3,5,4'-Trihydroxy-7-methoxyflavone (Rhamnocitrin) | Flavonoids                  | Flower16 | 46     |
|        | Isorhamnetin-3-O-rutinoside (Narcissin)           | Flavonoids                  | Flower18 | 46     |
|        | Kaempferol-3-O-sambubioside                       | Flavonoids                  | Flower21 | 46     |
|        | Luteolin-4'-O-glucoside                           | Flavonoids                  | Flower14 | 45     |
|        | Kaempferol-3-O-galactoside (Trifolin)             | Flavonoids                  | Flower19 | 45     |
|        | Kaempferol-3-O-glucoside (Astragalin)             | Flavonoids                  | Flower20 | 45     |
|        | Diosmetin-7-O-glucoside                           | Flavonoids                  | Flower10 | 43     |
|        | 6-C-MethylKaempferol-3-glucoside                  | Flavonoids                  | Flower12 | 43     |
|        | Rhamnetin-3-O-Rutinoside                          | Flavonoids                  | Flower24 | 43     |
|        | Kaempferol-7-O-glucoside                          | Flavonoids                  | Flower22 | 42     |
|        | Quercetin-3-O-rhamnoside(Quercitrin)              | Flavonoids                  | Flower23 | 42     |
|        | Guanosine                                         | Nucleotides and derivatives | Flower32 | 42     |
|        | L-Homocystine                                     | Amino acids and derivatives | Flower30 | 41     |
|        | Vidarabine                                        | Nucleotides and derivatives | Flower33 | 41     |
|        | Adenosine                                         | Nucleotides and derivatives | Flower34 | 41     |
|        | Persicoside                                       | Flavonoids                  | Flower5  | 41     |
|        | Isorhamnetin-3-O-neohesperidoside                 | Flavonoids                  | Flower17 | 40     |
|        | isoscopoletin                                     | Lignans and Coumarins       | Flower27 | 40     |
|        | Scopoletin (7-Hydroxy-6-methoxycoumarin)          | Lignans and Coumarins       | Flower28 | 38     |
|        | Gallic acid                                       | Phenolic acids              | Flower29 | 37     |
|        | Chrysoeriol-7-O-glucoside                         | Flavonoids                  | Flower8  | 37     |
|        | Savinin                                           | Lignans and Coumarins       | Flower26 | 36     |
|        | Hesperetin-7-O-glucoside                          | Flavonoids                  | Flower3  | 35     |
|        | Oleanolic acid-3-O-glucoside                      | Terpenoids                  | Flower7  | 35     |
|        | 3,5,7-Trihydroxyflavanone (Pinobanksin)           | Flavonoids                  | Flower6  | 34     |
|        | Shanzhiside methyl ester                          | Terpenoids                  | Flower1  | 32     |
|        | Oleanolic acid-3-O-glucoside                      | Terpenoids                  | Flower2  | 29     |
| Leaf   | Jujubogenin                                       | Terpenoids                  | Leaf3    | 81     |
|        | Serotonin                                         | Alkaloids                   | Leaf21   | 54     |
|        | Tryptamine                                        | Alkaloids                   | Leaf19   | 48     |
|        | L-Lysine                                          | Amino acids and derivatives | Leaf33   | 48     |
|        | Apigenin-7-O-neohesperidoside (Rhoifolin)         | Flavonoids                  | Leaf10   | 47     |
|        | Epigallocatechin                                  | Flavonoids                  | Leaf8    | 47     |

Table S4 Non-volatile metabolites for yellowhorn treat enuresis, hyperlipidemia, neurodegenerative diseases, and prostatitis (continued).

| Source | Name                                             | Classification              | No.    | Degree |
|--------|--------------------------------------------------|-----------------------------|--------|--------|
| Leaf   | Galocatechin                                     | Flavonoids                  | Leaf9  | 47     |
|        | Apigenin-7-O-rutinoside (Isorhoifolin)           | Flavonoids                  | Leaf11 | 46     |
|        | N-Methyltryptamine                               | Alkaloids                   | Leaf20 | 46     |
|        | Quercetin-3,7-Di-O-rhamnoside                    | Flavonoids                  | Leaf14 | 45     |
|        | DL-2-Aminoadipic acid                            | Alkaloids                   | Leaf18 | 44     |
|        | L-Valine                                         | Amino acids and derivatives | Leaf31 | 44     |
|        | Myricetin-3-O-galactoside                        | Flavonoids                  | Leaf12 | 43     |
|        | Cannabicitrin                                    | Flavonoids                  | Leaf13 | 42     |
|        | L-Glutamine                                      | Amino acids and derivatives | Leaf32 | 42     |
|        | Catechin                                         | Flavonoids                  | Leaf6  | 42     |
|        | Epicatechin                                      | Flavonoids                  | Leaf7  | 42     |
|        | N-Feruloylagmatine                               | Alkaloids                   | Leaf16 | 40     |
|        | Acetaminophen                                    | Alkaloids                   | Leaf17 | 40     |
|        | Cis-Coutaric acid                                | Phenolic acids              | Leaf26 | 38     |
|        | 5-Glucosyloxy-2-Hydroxybenzoic acid methyl ester | Phenolic acids              | Leaf28 | 38     |
|        | 3-O-p-Coumaroylquinic acid                       | Phenolic acids              | Leaf30 | 38     |
|        | Acetryptine                                      | Alkaloids                   | Leaf22 | 36     |
|        | Isofraxetin                                      | Lignans and Coumarins       | Leaf24 | 36     |
|        | 4-(3,4,5-Trihydroxybenzoxy)benzoic acid          | Phenolic acids              | Leaf29 | 36     |
|        | Hederagenin                                      | Terpenoids                  | Leaf4  | 36     |
|        | Fraxetin-8-O-glucoside (Fraxin)                  | Lignans and Coumarins       | Leaf23 | 34     |
|        | p-Coumaric acid-4-O-glucoside                    | Phenolic acids              | Leaf25 | 33     |
|        | 2-Nitrophenol                                    | Phenolic acids              | Leaf27 | 33     |
|        | Pomolic acid                                     | Terpenoids                  | Leaf1  | 32     |
|        | 30-Norhederagenin                                | Terpenoids                  | Leaf5  | 32     |
|        | 2-Phenylethylamine                               | Alkaloids                   | Leaf15 | 31     |
|        | Corosolic acid                                   | Terpenoids                  | Leaf2  | 29     |

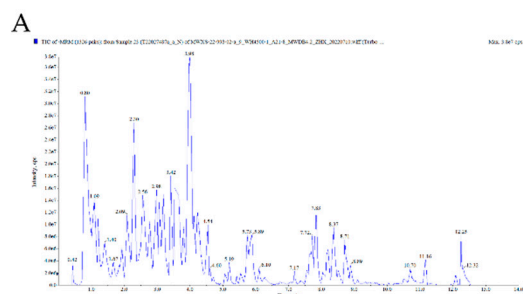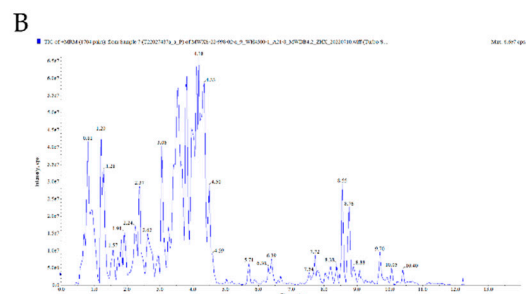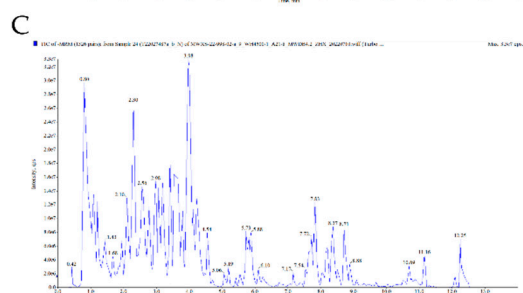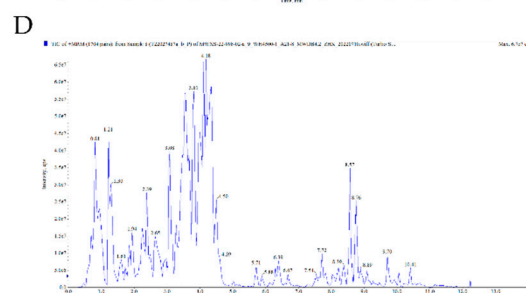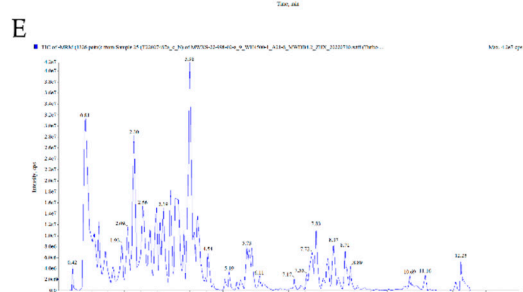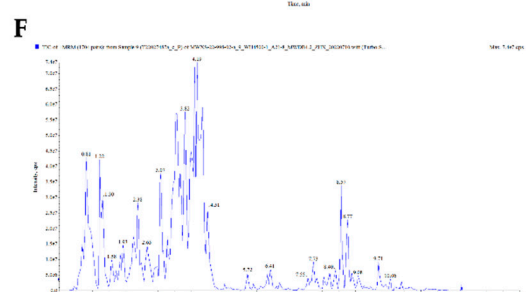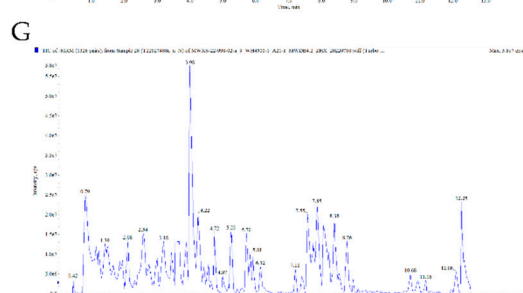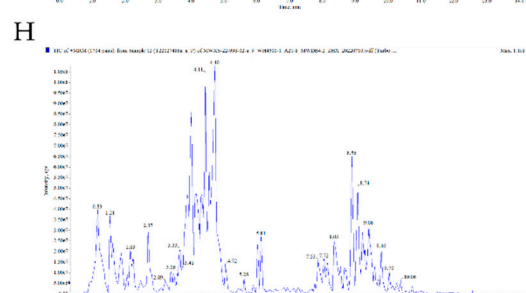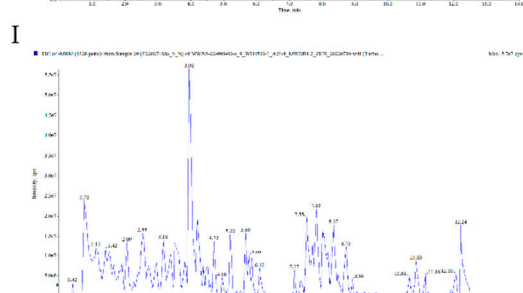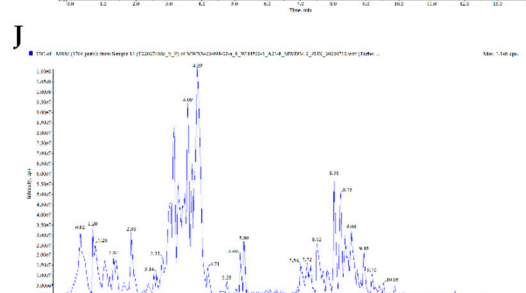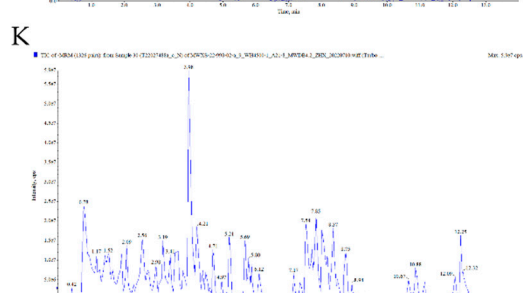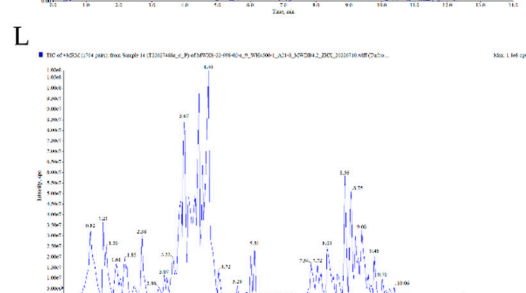

Figure S1 Total ions current of non-volatile metabolites in yellowhorn Leaf (A-F) and flower (G-L). (A, C, E, G, I, and K) Negative ion mode; (B, D, F, H, J, and L) positive ion mode.

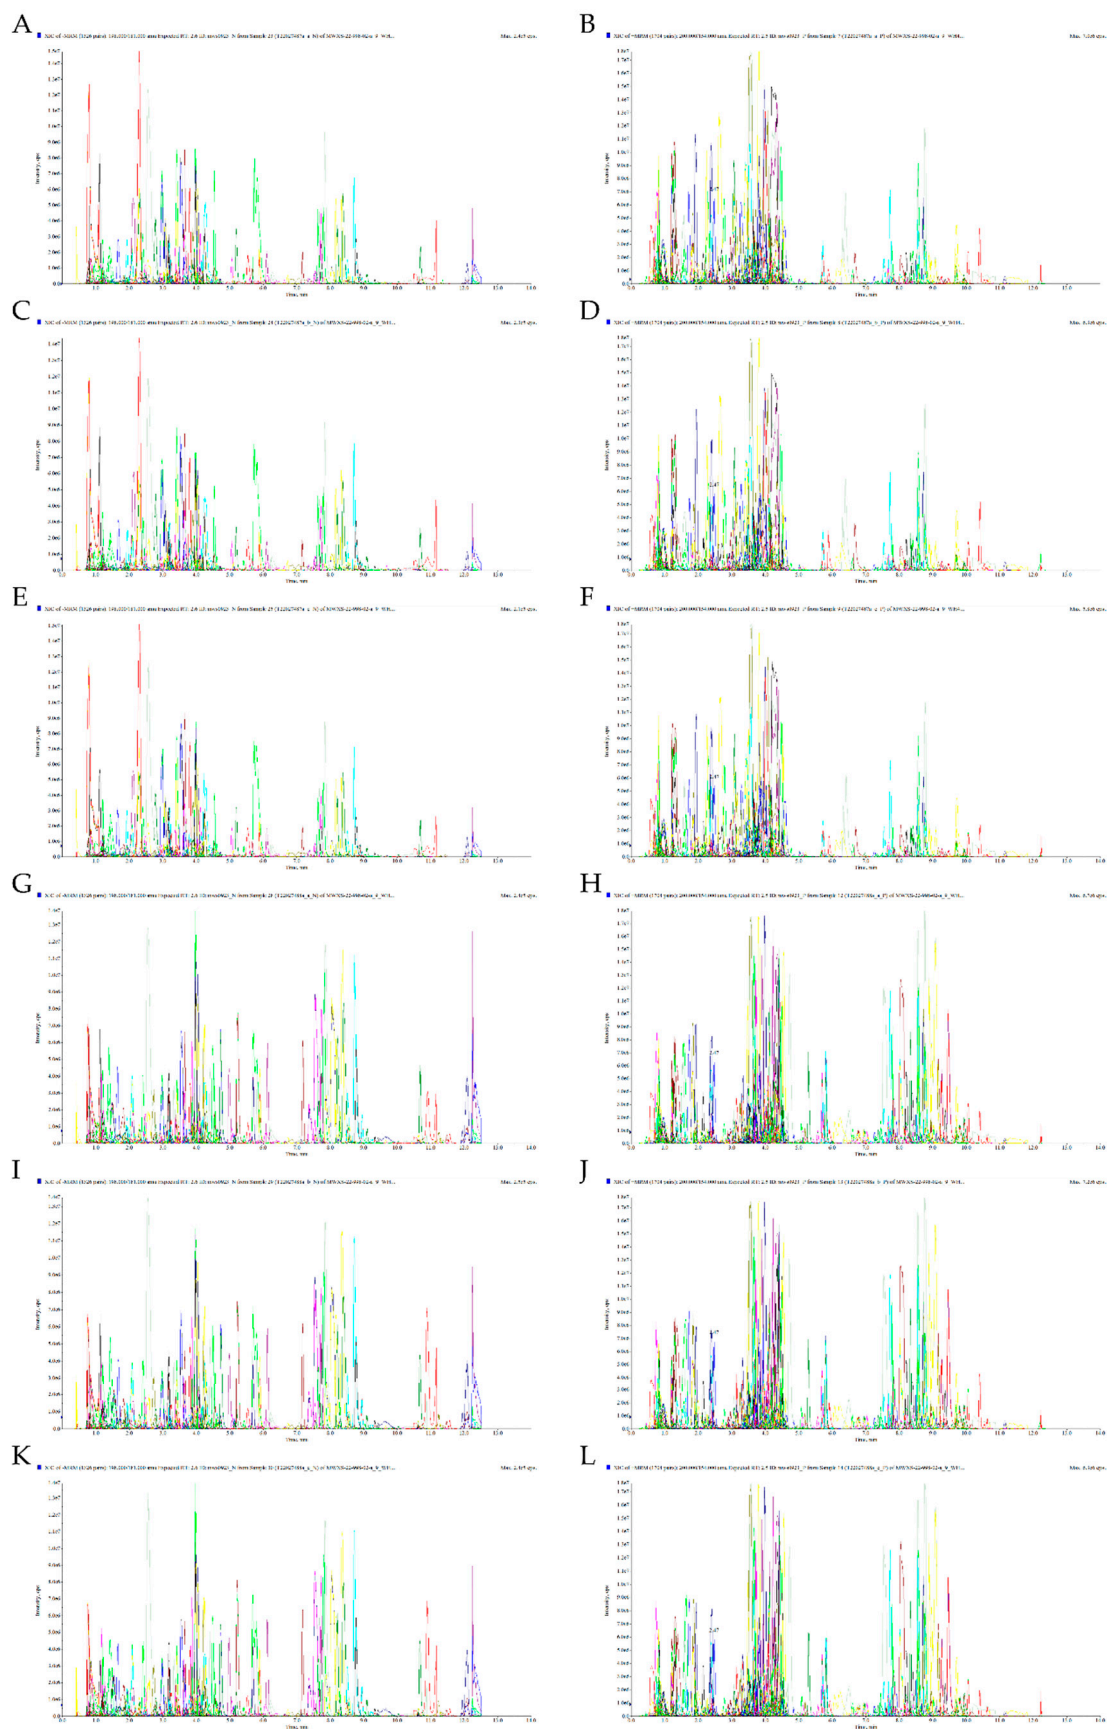

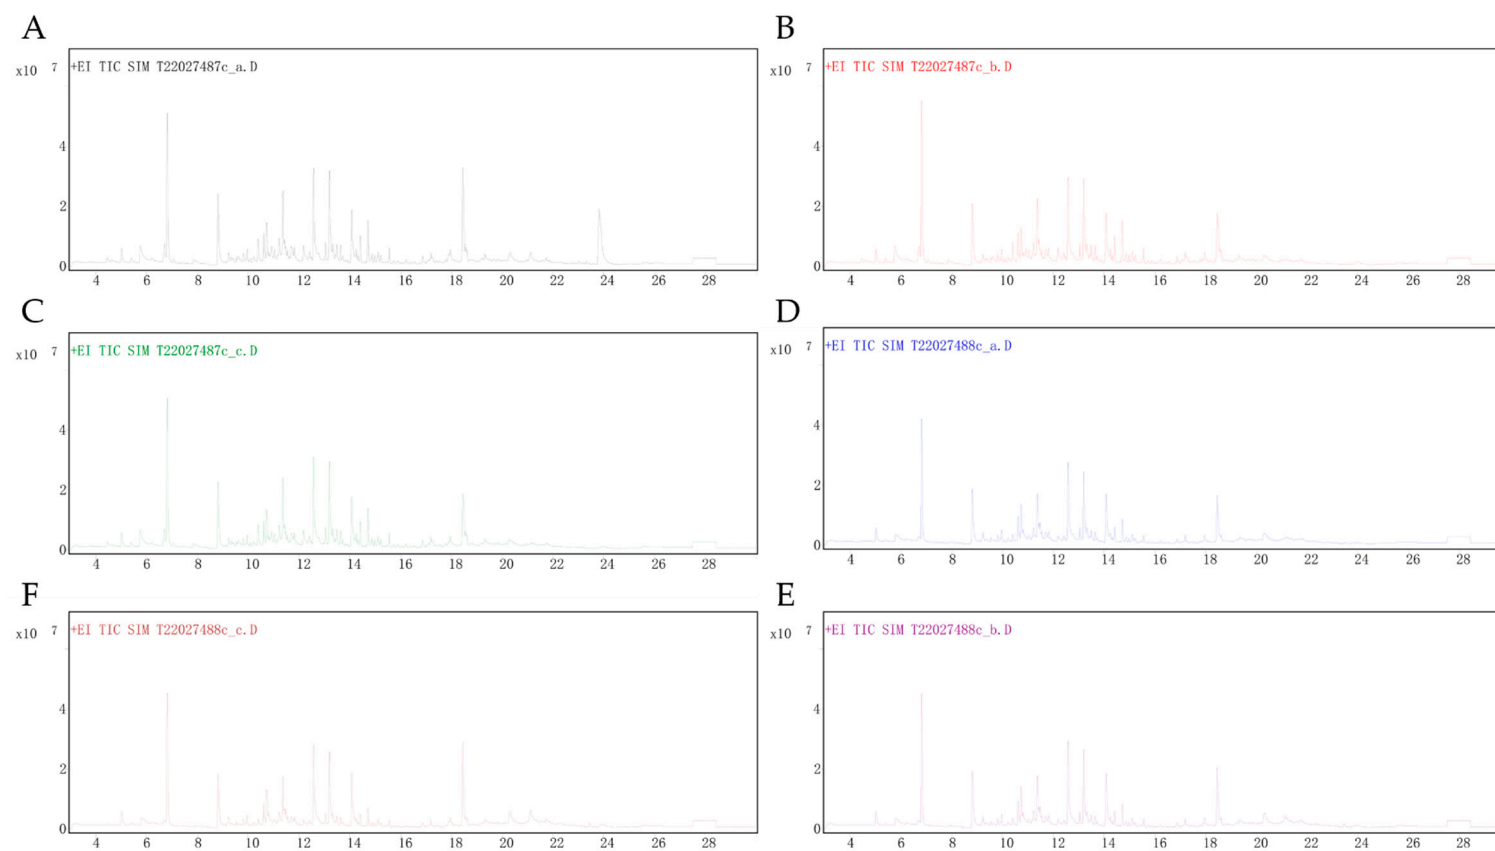

Figure S3. Total ions current of volatile metabolites in yellowhorn Leaf (A-B) and flower (D-E).



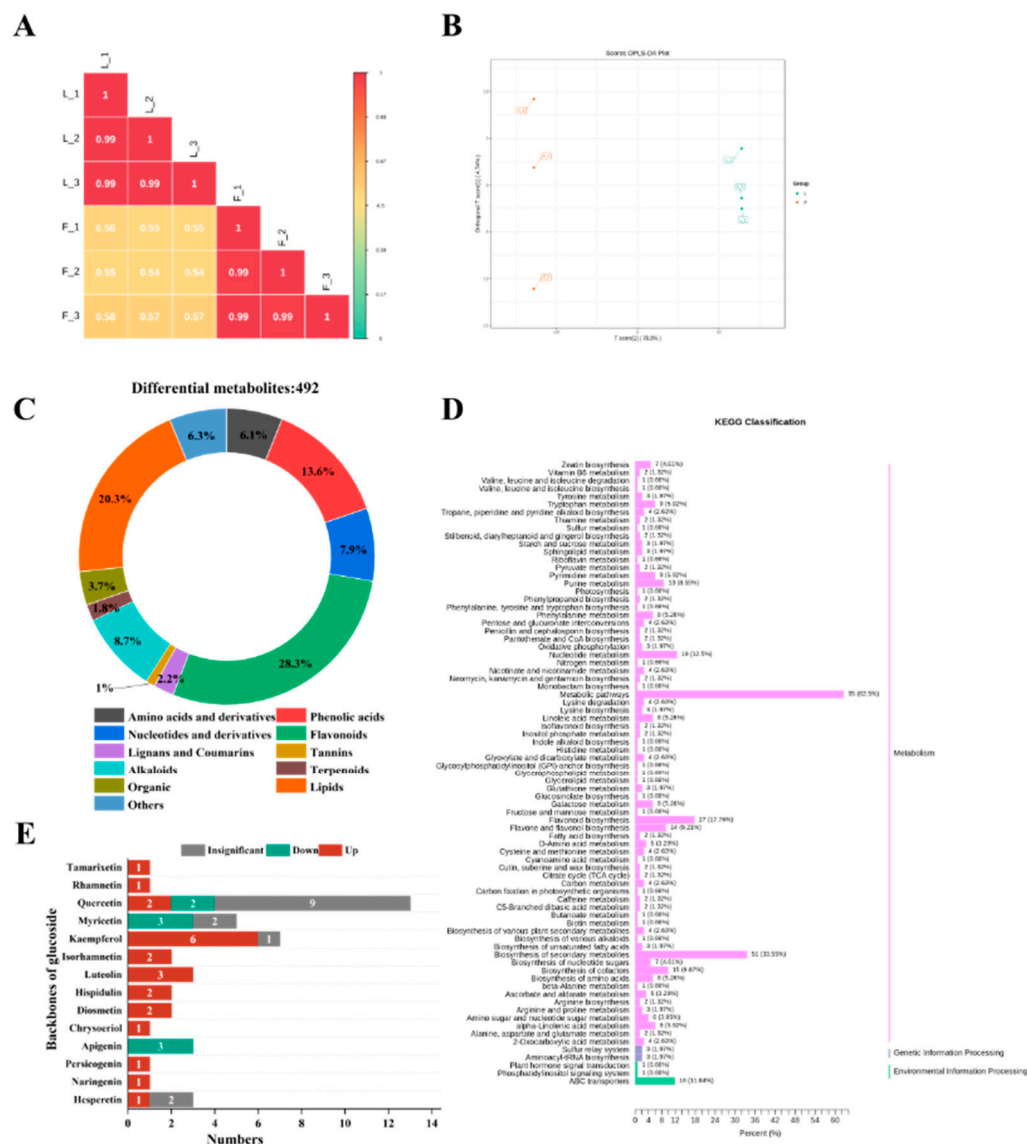

Figure. S4 Screening of significantly differentially expressed non-volatile metabolites in yellowhorn leaf and flower. (A) Correlation heat map of non-volatile metabolites of yellowhorn leaves and flowers; (B) Scores plots of OPLS-DA; (C) Proportion of different classes of differentially expressed non-volatile metabolites; (D) KEGG annotate ions and enrichment results of the differentially expressed non-volatile metabolites; (E) Differentially expressed non-volatile metabolites of yellowhorn leaves and flowers.
